# Supplementary material for: Rapid Screening of Microalgae as Potential Sources of Natural Antioxidants
Source: MDPI journal article supplement (doi:10.3390/foods12142652), 2023-07-10
Supplement: s1 [file s1]

# Rapid Screening of Microalgae as Potential Sources of Natural Antioxidants

Na Wang <sup>1,2,†</sup>, Haiwei Pei <sup>1,2,†</sup>, Wenzhou Xiang <sup>1,3</sup>, Tao Li <sup>1,3</sup>, Shengjie Lin <sup>4</sup>, Jiayi Wu <sup>1,3</sup>,  
Zishuo Chen <sup>1,2</sup>, Houbo Wu <sup>1,3</sup>, Chuanmao Li <sup>4</sup>, Hualian Wu <sup>1,3,\*</sup>

- <sup>1</sup> CAS Key Laboratory of Tropical Marine Bio-resources and Ecology, Guangdong Key Laboratory of Marine Materia Medica, RNAM Center for Marine Microbiology, Institution of South China Sea Ecology and Environmental Engineering, South China Sea Institute of Oceanology, Chinese Academy of Sciences, Guang-zhou 510301, China; nawang@scsio.ac.cn (N.W.); haiweipei@scsio.ac.cn (H.P.); xwz@scsio.ac.cn (W.X.); taoli@scsio.ac.cn (T.L.); kayeewu@scsio.ac.cn (J.W.); 18390943716@163.com (Z.C.); wuhoubo@scsio.ac.cn (H.W.)
- <sup>2</sup> University of Chinese Academy of Sciences, Beijing 100049, China
- <sup>3</sup> Southern Marine Science and Engineering Guangdong Laboratory (Guangzhou), No. 1119, Haibin Road, Nansha District, Guangzhou 511458, China
- <sup>4</sup> Guangzhou Keneng Cosmetic Scientific Research Co. Ltd, Guangzhou 510000, China; linsj@danzi.cn (S.L.); lichm@danzi.cn (C.L.)
- \* Correspondence: hlwu@scsio.ac.cn (H.W.); Tel.: +86-20-89023195 (H.W.)
- † These authors contributed equally to this work

Submitted to *Foods*

## Supplementary tables

**Table S1**

Table S1. Information of 16 microalgae species

| Serial number | Species                          | Classes         | Medium | Source                                                                                                                                                    |
|---------------|----------------------------------|-----------------|--------|-----------------------------------------------------------------------------------------------------------------------------------------------------------|
| SCSIO-46784   | <i>Chlorella sorokiniana</i>     | Chlorophyta     | BG-11  | Economic Microalgae Culture Collection of Guangdong Province (South China Sea Institute of Oceanography, Chinese Academy of Sciences)                     |
| SCSIO-46781   | <i>Euglena gracilis</i>          | Euglenophyta    | EGM    | Freshwater Algae Culture of Hydrobiology Collection at the Institute of Hydrobiology, Chinese Academy of Sciences (Wuhan, China),<br>Strain No. FACHB-849 |
| SCSIO-46716   | <i>Eustigmatos</i> sp.           | Chlorophyta     | BG-11  | Economic Microalgae Culture Collection of Guangdong Province (South China Sea Institute of Oceanography, Chinese Academy of Sciences)                     |
| SCSIO-45217   | <i>Nannochloropsis</i> sp.       | Chrysophyta     | F/2    | Economic Microalgae Culture Collection of Guangdong Province (South China Sea Institute of Oceanography, Chinese Academy of Sciences)                     |
| SCSIO-45006   | <i>Nannochloropsis</i> sp.       | Chrysophyta     | F/2    | Economic Microalgae Culture Collection of Guangdong Province (South China Sea Institute of Oceanography, Chinese Academy of Sciences)                     |
| SCSIO-45224   | <i>Nannochloropsis</i> sp.       | Chrysophyta     | F/2    | Economic Microalgae Culture Collection of Guangdong Province (South China Sea Institute of Oceanography, Chinese Academy of Sciences)                     |
| SCSIO-45120   | <i>Phaeodactylum tricornutum</i> | Becillariophyta | F/2    | Economic Microalgae Culture Collection of Guangdong Province (South China Sea Institute of Oceanography, Chinese Academy of Sciences)                     |
| SCSIO-45949   | <i>Porphyridium cruentum</i>     | Rhodophyta      | ASW    | Economic Microalgae Culture Collection of Guangdong Province (South China Sea Institute of Oceanography, Chinese Academy of Sciences)                     |
| SCSIO-45707   | <i>Rhodorus</i> sp               | Rhodophyta      | ASW    | Economic Microalgae Culture Collection of Guangdong Province (South China Sea                                                                             |

---

|             |                              |             |                       |                                                                                                                                       |
|-------------|------------------------------|-------------|-----------------------|---------------------------------------------------------------------------------------------------------------------------------------|
|             |                              |             |                       | Institute of Oceanography, Chinese Academy of Sciences)                                                                               |
| SCSIO-46548 | <i>Asterarcys</i> sp.        | Chlorophyta | ZSNT<br>(fresh water) | Economic Microalgae Culture Collection of Guangdong Province (South China Sea Institute of Oceanography, Chinese Academy of Sciences) |
| SCSIO-45829 | <i>Asterarcys</i> sp.        | Chlorophyta | ZSNT<br>(seawater)    | Economic Microalgae Culture Collection of Guangdong Province (South China Sea Institute of Oceanography, Chinese Academy of Sciences) |
| SCSIO-46585 | <i>Scenedesmus</i> sp.       | Chlorophyta | BG-11                 | Economic Microalgae Culture Collection of Guangdong Province (South China Sea Institute of Oceanography, Chinese Academy of Sciences) |
| SCSIO-46579 | <i>Scenedesmus</i> sp.       | Chlorophyta | BG-11                 | Economic Microalgae Culture Collection of Guangdong Province (South China Sea Institute of Oceanography, Chinese Academy of Sciences) |
| SCSIO-46591 | <i>Scenedesmus</i> sp.       | Chlorophyta | BG-11                 | Economic Microalgae Culture Collection of Guangdong Province (South China Sea Institute of Oceanography, Chinese Academy of Sciences) |
| SCSIO-44012 | <i>Arthrospira platensis</i> | Cyanophyta  | Zarrouk               | Economic Microalgae Culture Collection of Guangdong Province (South China Sea Institute of Oceanography, Chinese Academy of Sciences) |
| SCSIO-46782 | <i>Uronema</i> sp.           | Chlorophyta | BG-11                 | Economic Microalgae Culture Collection of Guangdong Province (South China Sea Institute of Oceanography, Chinese Academy of Sciences) |

---

**Table S2**

Table S2. Components of BG11 medium

| Serial number | Compound                                            | Concentration         |
|---------------|-----------------------------------------------------|-----------------------|
| 1             | NaNO <sub>3</sub>                                   | 1.5 g L <sup>-1</sup> |
| 2             | Na <sub>2</sub> HPO <sub>4</sub> ·3H <sub>2</sub> O | 40 mg L <sup>-1</sup> |
| 3             | MgSO <sub>4</sub> ·7H <sub>2</sub> O                | 75 mg L <sup>-1</sup> |
| 4             | CaCl <sub>2</sub> ·2H <sub>2</sub> O                | 36 mg L <sup>-1</sup> |
| 5             | C <sub>6</sub> H <sub>8</sub> FeNO <sub>7</sub>     | 6 mg L <sup>-1</sup>  |
| 6             | C <sub>6</sub> H <sub>8</sub> O <sub>7</sub>        | 6 mg L <sup>-1</sup>  |
| 7             | EDTA                                                | 1 mg L <sup>-1</sup>  |
| 8             | Na <sub>2</sub> CO <sub>3</sub>                     | 20 mg L <sup>-1</sup> |
| 9             | A <sub>5</sub>                                      | 1 mL L <sup>-1</sup>  |

**Table S3**Table S3. Components of A<sub>5</sub>

| Serial number | Compound                                             | Concentration          |
|---------------|------------------------------------------------------|------------------------|
| 1             | H <sub>3</sub> BO <sub>3</sub>                       | 2.86 g L <sup>-1</sup> |
| 2             | MnCl <sub>2</sub> ·4H <sub>2</sub> O                 | 1.81 g L <sup>-1</sup> |
| 3             | ZnSO <sub>4</sub> ·7H <sub>2</sub> O                 | 0.22 g L <sup>-1</sup> |
| 4             | Na <sub>2</sub> MoO <sub>4</sub> ·2H <sub>2</sub> O  | 0.39 g L <sup>-1</sup> |
| 5             | CuSO <sub>4</sub> ·5H <sub>2</sub> O                 | 0.08 g L <sup>-1</sup> |
| 6             | Co(NO <sub>3</sub> ) <sub>2</sub> ·6H <sub>2</sub> O | 0.05 g L <sup>-1</sup> |

**Table S4**

Table S4. Components of F/2 medium

| Serial number | Compound                                            | Concentration          |
|---------------|-----------------------------------------------------|------------------------|
| 1             | NaNO <sub>3</sub>                                   | 75 mg L <sup>-1</sup>  |
| 2             | NaH <sub>2</sub> PO <sub>4</sub> ·2H <sub>2</sub> O | 5 mg L <sup>-1</sup>   |
| 3             | Na <sub>2</sub> SiO <sub>3</sub> ·9H <sub>2</sub> O | 30 mg L <sup>-1</sup>  |
| 4             | F/2 trace metal solution                            | 1 mL L <sup>-1</sup>   |
| 5             | F/2 vitamin solution                                | 0.5 mL L <sup>-1</sup> |

**Table S5**

Table S5. Components of F/2 trace metal solution

| Serial number | Compound                                            | Concentration           |
|---------------|-----------------------------------------------------|-------------------------|
| 1             | $\text{FeCl}_3 \cdot 6\text{H}_2\text{O}$           | $3.15 \text{ g L}^{-1}$ |
| 2             | $\text{EDTANa}_2 \cdot 2\text{H}_2\text{O}$         | $4.36 \text{ g L}^{-1}$ |
| 3             | $\text{CuSO}_4 \cdot 5\text{H}_2\text{O}$           | $9.8 \text{ mg L}^{-1}$ |
| 4             | $\text{Na}_2\text{MoO}_4 \cdot 2\text{H}_2\text{O}$ | $6.3 \text{ mg L}^{-1}$ |
| 5             | $\text{ZnSO}_4 \cdot 7\text{H}_2\text{O}$           | $22 \text{ mg L}^{-1}$  |
| 6             | $\text{CoCl}_2 \cdot 6\text{H}_2\text{O}$           | $10 \text{ mg L}^{-1}$  |
| 7             | $\text{MnCl}_2 \cdot 4\text{H}_2\text{O}$           | $180 \text{ mg L}^{-1}$ |

## Table S6

Table S6. Components of F/2 vitamin solution

| Serial number | Compound                | Concentration         |
|---------------|-------------------------|-----------------------|
| 1             | Vitamin B <sub>12</sub> | 1 mg L <sup>-1</sup>  |
| 2             | Biotin                  | 1 mg L <sup>-1</sup>  |
| 3             | Thiamine·HCl            | 0.2 g L <sup>-1</sup> |



**Table S7**

Table S7. Components of ASW medium

| Serial number | Compound                                            | Concentration           |
|---------------|-----------------------------------------------------|-------------------------|
| 1             | NaCl                                                | 27 g L <sup>-1</sup>    |
| 2             | MgSO <sub>4</sub> ·7H <sub>2</sub> O                | 6.6 g L <sup>-1</sup>   |
| 3             | MgCl <sub>2</sub> ·6H <sub>2</sub> O                | 5.6 g L <sup>-1</sup>   |
| 4             | CaCl <sub>2</sub> ·2H <sub>2</sub> O                | 1.5 g L <sup>-1</sup>   |
| 5             | KNO <sub>3</sub>                                    | 1.45 g L <sup>-1</sup>  |
| 6             | K <sub>2</sub> HPO <sub>4</sub>                     | 0.12 g L <sup>-1</sup>  |
| 7             | EDTANa <sub>2</sub> ·2H <sub>2</sub> O              | 4.36 mg L <sup>-1</sup> |
| 8             | FeCl <sub>3</sub> ·6H <sub>2</sub> O                | 3.15 mg L <sup>-1</sup> |
| 9             | MnCl <sub>2</sub> ·4H <sub>2</sub> O                | 180 µg L <sup>-1</sup>  |
| 10            | ZnSO <sub>4</sub> ·7H <sub>2</sub> O                | 22 µg L <sup>-1</sup>   |
| 11            | Na <sub>2</sub> MoO <sub>4</sub> ·2H <sub>2</sub> O | 6 µg L <sup>-1</sup>    |
| 12            | CoCl <sub>2</sub> ·6H <sub>2</sub> O                | 10 µg L <sup>-1</sup>   |
| 13            | CuSO <sub>4</sub> ·5H <sub>2</sub> O                | 10 µg L <sup>-1</sup>   |

**Table S8**

Table S8. Components of modified ZSNT medium

| Serial number | Compound                                            | Concentration          |
|---------------|-----------------------------------------------------|------------------------|
| 1             | NaNO <sub>3</sub>                                   | 1.5 g L <sup>-1</sup>  |
| 2             | NaH <sub>2</sub> PO <sub>4</sub> ·2H <sub>2</sub> O | 0.05 g L <sup>-1</sup> |
| 3             | CaCl <sub>2</sub>                                   | 0.02 g L <sup>-1</sup> |
| 4             | MgSO <sub>4</sub> ·7H <sub>2</sub> O                | 0.05 g L <sup>-1</sup> |
| 5             | KCl                                                 | 0.1 g L <sup>-1</sup>  |
| 6             | K <sub>2</sub> SO <sub>4</sub>                      | 0.3 g L <sup>-1</sup>  |
| 7             | M <sub>2</sub>                                      | 1 mL L <sup>-1</sup>   |
| 8             | A <sub>5</sub>                                      | 1 mL L <sup>-1</sup>   |

**Table S9**Table S9. Components of M<sub>2</sub>

| Serial number | Compound                               | Concentration          |
|---------------|----------------------------------------|------------------------|
| 1             | FeCl <sub>3</sub> ·6H <sub>2</sub> O   | 2.44 g L <sup>-1</sup> |
| 2             | EDTANa <sub>2</sub> ·2H <sub>2</sub> O | 1.89 g L <sup>-1</sup> |

**Table S10**

Table S10. Components of modified EGM medium

| Serial number | Compound                                        | Concentration           |
|---------------|-------------------------------------------------|-------------------------|
| 1             | NH <sub>4</sub> Cl                              | 0.83 g L <sup>-1</sup>  |
| 2             | KH <sub>2</sub> PO <sub>4</sub>                 | 1 g L <sup>-1</sup>     |
| 3             | MgSO <sub>4</sub> ·7H <sub>2</sub> O            | 0.2 g L <sup>-1</sup>   |
| 4             | CaCl <sub>2</sub>                               | 0.02 g L <sup>-1</sup>  |
| 5             | Fe <sub>2</sub> (SO <sub>4</sub> ) <sub>3</sub> | 3 mg L <sup>-1</sup>    |
| 6             | EDTANa <sub>2</sub> ·2H <sub>2</sub> O          | 0.48 mg L <sup>-1</sup> |
| 7             | Vitamin B <sub>1</sub>                          | 0.1 mg L <sup>-1</sup>  |
| 8             | Vitamin B <sub>12</sub>                         | 0.1 µg L <sup>-1</sup>  |
| 9             | A <sub>5</sub>                                  | 1 mL L <sup>-1</sup>    |

**Table S11**

Table S11. Components of Zarrouk medium

| Serial number | Compound                                            | Concentration          |
|---------------|-----------------------------------------------------|------------------------|
| 1             | NaHCO <sub>3</sub>                                  | 5 g L <sup>-1</sup>    |
| 2             | NaNO <sub>3</sub>                                   | 0.5 g L <sup>-1</sup>  |
| 3             | FeSO <sub>4</sub> ·7H <sub>2</sub> O                | 5 mg L <sup>-1</sup>   |
| 4             | NaH <sub>2</sub> PO <sub>4</sub> ·2H <sub>2</sub> O | 0.02 g L <sup>-1</sup> |
| 5             | K <sub>2</sub> SO <sub>4</sub>                      | 0.5 g L <sup>-1</sup>  |
| 6             | MgSO <sub>4</sub> ·7H <sub>2</sub> O                | 0.5 g L <sup>-1</sup>  |
| 7             | CaCl <sub>2</sub>                                   | 0.04 g L <sup>-1</sup> |
| 8             | A <sub>5</sub>                                      | 1 mL L <sup>-1</sup>   |

**Table S12**Table S12. Carotenoids contents (mg g<sup>-1</sup> biomass) of the extracts from 16 microalgae strains

| Species                                         | One step               | Three steps |              |           |                        |
|-------------------------------------------------|------------------------|-------------|--------------|-----------|------------------------|
|                                                 | ethanol/water          | hexane      | ethylacetate | water     | total                  |
| <i>Chlorella sorokiniana</i><br>SCSIO-46784     | 1.02±0.04 <sup>b</sup> | 0.28±0.01   | 0.23±0.01    | N.D.      | 0.51±0.02 <sup>a</sup> |
| <i>Euglena gracilis</i><br>SCSIO-46781          | 3.71±0.14 <sup>a</sup> | 2.23±0.02   | 3.84±0.10    | N.D.      | 6.07±0.12 <sup>b</sup> |
| <i>Eustigmatus</i> sp.<br>SCSIO-46716           | 0.08±0.00 <sup>a</sup> | 0.05±0.00   | 0.03±0.00    | 0.01±0.00 | 0.09±0.01 <sup>b</sup> |
| <i>Nannochloropsis</i> sp.<br>SCSIO-45217       | 0.68±0.00 <sup>b</sup> | 0.21±0.03   | 0.22±0.01    | 0.14±0.00 | 0.57±0.03 <sup>a</sup> |
| <i>Nannochloropsis</i> sp.<br>SCSIO-45006       | 0.79±0.05 <sup>a</sup> | 0.40±0.02   | 0.47±0.00    | N.D.      | 0.86±0.02 <sup>a</sup> |
| <i>Nannochloropsis</i> sp.<br>SCSIO-45224       | 2.37±0.05 <sup>a</sup> | 0.86±0.01   | 1.40±0.03    | 0.41±0.01 | 2.67±0.02 <sup>b</sup> |
| <i>Phaeodactylum tricornutum</i><br>SCSIO-45120 | 5.45±0.09 <sup>b</sup> | 0.20±0.00   | 0.28±0.01    | 0.10±0.00 | 0.58±0.01 <sup>a</sup> |
| <i>Porphyridium cruentum</i><br>SCSIO-45949     | 0.37±0.03 <sup>a</sup> | 0.37±0.03   | N.D.         | 0.04±0.04 | 0.41±0.07 <sup>a</sup> |
| <i>Rhodorus</i> sp.<br>SCSIO-45707              | 0.02±0.00 <sup>a</sup> | 0.01±0.00   | 0.01±0.00    | 0.03±0.00 | 0.05±0.01 <sup>b</sup> |
| <i>Asterarcys</i> sp.<br>SCSIO-46548            | 1.14±0.02 <sup>a</sup> | 0.44±0.04   | 1.13±0.06    | 0.20±0.03 | 1.77±0.13 <sup>b</sup> |
| <i>Asterarcys</i> sp.<br>SCSIO-45829            | 2.06±0.05 <sup>a</sup> | 1.17±0.14   | 2.37±0.20    | 0.17±0.01 | 3.61±0.35 <sup>b</sup> |
| <i>Scenedesmus</i> sp.<br>SCSIO-46585           | 0.29±0.00 <sup>b</sup> | 0.02±0.00   | 0.03±0.00    | N.D.      | 0.05±0.00 <sup>a</sup> |
| <i>Scenedesmus</i> sp.<br>SCSIO-46579           | 0.86±0.06 <sup>b</sup> | 0.04±0.01   | 0.05±0.00    | N.D.      | 0.10±0.01 <sup>a</sup> |
| <i>Scenedesmus</i> sp.<br>SCSIO-46591           | 0.10±0.00 <sup>b</sup> | 0.02±0.00   | 0.04±0.00    | N.D.      | 0.06±0.01 <sup>a</sup> |
| <i>Arthrospira platensis</i><br>SCSIO-44012     | 1.36±0.06 <sup>a</sup> | 1.03±0.03   | 0.32±0.01    | 0.18±0.02 | 1.53±0.01 <sup>a</sup> |
| <i>Uronema</i> sp.<br>SCSIO-46782               | 2.22±0.03 <sup>b</sup> | 0.16±0.01   | 0.13±0.01    | 0.01±0.01 | 0.31±0.01 <sup>a</sup> |

Note: N.D. = not detectable; different letters indicated significant differences in carotenoids contents of microalgae extracts obtained by one-step and three-step methods ( $p<0.05$ ).

**Table S13**Table S13. Phenols contents (mg g<sup>-1</sup> biomass) of the extracts from 16 microalgae strains

| Species                                         | One step               | Three steps |              |           |                         |
|-------------------------------------------------|------------------------|-------------|--------------|-----------|-------------------------|
|                                                 | ethanol/water          | hexane      | ethylacetate | water     | total                   |
| <i>Chlorella sorokiniana</i><br>SCSIO-46784     | 1.81±0.09 <sup>a</sup> | 1.08±0.05   | N.D.         | 1.07±0.05 | 2.16±0.04 <sup>b</sup>  |
| <i>Euglena gracilis</i><br>SCSIO-46781          | 3.90±0.06 <sup>a</sup> | 4.31±0.07   | 6.26±0.25    | 1.16±0.03 | 11.73±0.22 <sup>b</sup> |
| <i>Eustigmatos</i> sp.<br>SCSIO-46716           | 0.58±0.01 <sup>a</sup> | 0.37±0.02   | 0.28±0.00    | 1.23±0.05 | 1.88±0.06 <sup>b</sup>  |
| <i>Nannochloropsis</i> sp.<br>SCSIO-45217       | 1.23±0.01 <sup>a</sup> | 1.34±0.09   | 0.53±0.04    | 0.50±0.03 | 2.36±0.15 <sup>b</sup>  |
| <i>Nannochloropsis</i> sp.<br>SCSIO-45006       | 2.80±0.30 <sup>a</sup> | 2.55±0.43   | 1.19±0.04    | 1.39±0.12 | 5.13±0.58 <sup>b</sup>  |
| <i>Nannochloropsis</i> sp.<br>SCSIO-45224       | 2.39±0.06 <sup>a</sup> | 1.51±0.06   | 2.07±0.20    | 1.88±0.05 | 5.46±0.23 <sup>b</sup>  |
| <i>Phaeodactylum tricornutum</i><br>SCSIO-45120 | 3.69±0.03 <sup>b</sup> | 0.32±0.02   | 0.40±0.03    | 1.77±0.01 | 2.50±0.02 <sup>a</sup>  |
| <i>Porphyridium cruentum</i><br>SCSIO-45949     | 0.94±0.02 <sup>a</sup> | 0.49±0.03   | 0.89±0.01    | 0.61±0.10 | 1.99±0.11 <sup>b</sup>  |
| <i>Rhodorus</i> sp.<br>SCSIO-45707              | 0.43±0.05 <sup>a</sup> | 0.23±0.01   | 0.25±0.01    | 0.38±0.01 | 0.86±0.02 <sup>b</sup>  |
| <i>Asterarcys</i> sp.<br>SCSIO-46548            | 2.90±0.23 <sup>b</sup> | 0.23±0.05   | 0.18±0.03    | 1.90±0.28 | 2.31±0.36 <sup>a</sup>  |
| <i>Asterarcys</i> sp.<br>SCSIO-45829            | 2.89±0.06 <sup>a</sup> | 0.62±0.36   | 0.13±0.05    | 3.01±0.06 | 3.76±0.47 <sup>b</sup>  |
| <i>Scenedesmus</i> sp.<br>SCSIO-46585           | 1.51±0.02 <sup>a</sup> | 0.30±0.03   | N.D.         | 1.45±0.03 | 1.76±0.05 <sup>b</sup>  |
| <i>Scenedesmus</i> sp.<br>SCSIO-46579           | 1.93±0.24 <sup>a</sup> | 0.24±0.02   | 0.29±0.02    | 1.03±0.12 | 1.56±0.11 <sup>a</sup>  |
| <i>Scenedesmus</i> sp.<br>SCSIO-46591           | 1.15±0.04 <sup>a</sup> | 0.21±0.02   | 0.22±0.01    | 1.23±0.07 | 1.66±0.08 <sup>b</sup>  |
| <i>Arthrospira platensis</i><br>SCSIO-44012     | 1.45±0.12 <sup>a</sup> | 0.82±0.05   | 2.59±0.12    | 2.03±0.06 | 5.44±0.11 <sup>b</sup>  |
| <i>Uronema</i> sp.<br>SCSIO-46782               | 2.17±0.00 <sup>a</sup> | 0.39±0.03   | 0.77±0.15    | 1.05±0.12 | 2.21±0.03 <sup>a</sup>  |

Note: N.D. = not detectable; different letters indicated significant differences in phenols contents of microalgae extracts obtained by one-step and three-step methods ( $p<0.05$ ).

**Table S14**

Table S14. ABTS radicals scavenging capacity of the ethanol/water extraction extracts and the fractionating procedure extracts from 16 microalgae strains

| Species                                         | One step                | Three steps |              |            |                         |
|-------------------------------------------------|-------------------------|-------------|--------------|------------|-------------------------|
|                                                 | ethanol/water           | hexane      | ethylacetate | water      | total                   |
| <i>Chlorella sorokiniana</i><br>SCSIO-46784     | 24.55±0.97 <sup>a</sup> | 6.74±0.15   | 7.98±0.37    | 12.76±1.19 | 27.49±1.06 <sup>a</sup> |
| <i>Euglena gracilis</i><br>SCSIO-46781          | 29.60±0.95 <sup>a</sup> | 23.13±2.16  | 19.52±1.42   | 13.40±0.37 | 56.06±3.45 <sup>b</sup> |
| <i>Eustigmatis</i> sp.<br>SCSIO-46716           | 6.82±0.37 <sup>a</sup>  | 1.94±0.04   | 2.00±0.10    | 7.80±0.13  | 11.73±0.20 <sup>b</sup> |
| <i>Nannochloropsis</i> sp.<br>SCSIO-45217       | 8.95±0.70 <sup>a</sup>  | 5.52±0.53   | 4.84±1.73    | 4.87±0.38  | 15.23±1.68 <sup>b</sup> |
| <i>Nannochloropsis</i> sp.<br>SCSIO-45006       | 18.22±0.21 <sup>a</sup> | 6.11±0.16   | 7.93±0.28    | 14.29±0.56 | 28.33±0.56 <sup>b</sup> |
| <i>Nannochloropsis</i> sp.<br>SCSIO-45224       | 28.80±0.27 <sup>b</sup> | 7.63±0.39   | 8.01±0.14    | 8.69±0.42  | 24.33±0.68 <sup>a</sup> |
| <i>Phaeodactylum tricornutum</i><br>SCSIO-45120 | 22.62±0.05 <sup>a</sup> | 2.09±0.15   | 2.96±0.12    | 22.10±0.30 | 27.15±0.25 <sup>b</sup> |
| <i>Porphyridium cruentum</i><br>SCSIO-45949     | 5.80±0.65 <sup>a</sup>  | 4.70±0.16   | 5.77±0.39    | 5.57±0.38  | 16.05±0.72 <sup>b</sup> |
| <i>Rhodorus</i> sp.<br>SCSIO-45707              | 3.67±0.09 <sup>a</sup>  | 1.19±0.32   | 1.54±0.15    | 5.63±0.03  | 8.36±0.43 <sup>b</sup>  |
| <i>Asterarcys</i> sp.<br>SCSIO-46548            | 17.12±0.16 <sup>b</sup> | N.D.        | N.D.         | 5.86±0.47  | 5.86±0.47 <sup>a</sup>  |
| <i>Asterarcys</i> sp.<br>SCSIO-45829            | 20.32±0.12 <sup>b</sup> | 1.47±0.33   | 0.09±0.02    | 8.11±1.07  | 9.67±1.42 <sup>a</sup>  |
| <i>Scenedesmus</i> sp.<br>SCSIO-46585           | 13.63±0.62 <sup>a</sup> | N.D.        | N.D.         | 5.55±0.13  | 12.44±0.34 <sup>a</sup> |
| <i>Scenedesmus</i> sp.<br>SCSIO-46579           | 15.21±1.01 <sup>b</sup> | N.D.        | 0.29±0.12    | 6.01±0.62  | 6.30±0.51 <sup>a</sup>  |
| <i>Scenedesmus</i> sp.<br>SCSIO-46591           | 8.85±0.70 <sup>a</sup>  | N.D.        | N.D.         | 7.12±0.77  | 7.12±0.77 <sup>a</sup>  |
| <i>Arthrospira platensis</i><br>SCSIO-44012     | 20.97±1.15 <sup>a</sup> | 6.03±0.35   | 14.98±0.57   | 21.72±0.05 | 42.73±0.53 <sup>b</sup> |
| <i>Uronema</i> sp.<br>SCSIO-46782               | 24.72±0.25 <sup>a</sup> | 3.50±0.07   | 4.56±0.25    | 14.04±0.86 | 22.10±1.12 <sup>a</sup> |

Note: N.D. = not detectable; different letters indicated significant differences in ABTS radicals scavenging capacity of microalgae extracts obtained by one-step and three-step methods ( $p<0.05$ ).



**Table S15**

Table S15. DPPH radicals scavenging capacity of the ethanol/water extraction extracts and the fractionating procedure extracts from 16 microalgae strains

| Species                                         | One step                | Three steps |              |           |                         |
|-------------------------------------------------|-------------------------|-------------|--------------|-----------|-------------------------|
|                                                 | ethanol/water           | hexane      | ethylacetate | water     | total                   |
| <i>Chlorella sorokiniana</i><br>SCSIO-46784     | 9.99±0.62 <sup>a</sup>  | 3.94±0.41   | 2.37±0.04    | 3.00±0.39 | 9.31±0.58 <sup>a</sup>  |
| <i>Euglena gracilis</i><br>SCSIO-46781          | 16.84±0.38 <sup>a</sup> | 15.49±0.69  | 13.43±0.74   | 5.12±0.41 | 34.04±1.66 <sup>b</sup> |
| <i>Eustigmatis</i> sp.<br>SCSIO-46716           | 5.26±0.19 <sup>a</sup>  | 1.31±0.51   | 0.10±0.08    | 2.57±0.14 | 3.97±0.63 <sup>a</sup>  |
| <i>Nannochloropsis</i> sp.<br>SCSIO-45217       | 5.43±0.13 <sup>a</sup>  | 7.83±0.25   | 2.71±0.15    | 2.05±0.28 | 12.60±0.52 <sup>b</sup> |
| <i>Nannochloropsis</i> sp.<br>SCSIO-45006       | 7.89±0.28 <sup>a</sup>  | 7.31±0.63   | 4.87±0.68    | 7.60±0.34 | 19.78±0.41 <sup>b</sup> |
| <i>Nannochloropsis</i> sp.<br>SCSIO-45224       | 14.20±0.18 <sup>a</sup> | 4.11±0.56   | 7.26±0.10    | 7.99±0.56 | 19.36±0.10 <sup>b</sup> |
| <i>Phaeodactylum tricornutum</i><br>SCSIO-45120 | 18.27±0.69 <sup>b</sup> | 1.60±0.17   | 3.88±0.10    | 3.20±0.14 | 8.69±0.41 <sup>a</sup>  |
| <i>Porphyridium cruentum</i><br>SCSIO-45949     | 2.58±0.04 <sup>a</sup>  | 2.48±0.10   | 2.72±0.13    | 3.25±0.30 | 8.45±0.45 <sup>b</sup>  |
| <i>Rhodorus</i> sp.<br>SCSIO-45707              | 2.45±0.48 <sup>a</sup>  | N.D.        | N.D.         | 1.46±0.11 | 1.46±0.11 <sup>a</sup>  |
| <i>Asterarcys</i> sp.<br>SCSIO-46548            | 10.14±0.65 <sup>a</sup> | 0.93±0.13   | 3.02±0.02    | 4.88±0.11 | 8.83±0.26 <sup>a</sup>  |
| <i>Asterarcys</i> sp.<br>SCSIO-45829            | 10.26±0.46 <sup>a</sup> | 2.60±0.19   | 4.22±0.02    | 2.79±0.00 | 9.61±0.21 <sup>a</sup>  |
| <i>Scenedesmus</i> sp.<br>SCSIO-46585           | 7.23±0.08 <sup>b</sup>  | N.D.        | 1.84±0.13    | 3.83±0.29 | 5.67±0.30 <sup>a</sup>  |
| <i>Scenedesmus</i> sp.<br>SCSIO-46579           | 9.81±0.22 <sup>b</sup>  | N.D.        | 0.46±0.06    | 2.30±0.08 | 2.76±0.13 <sup>a</sup>  |
| <i>Scenedesmus</i> sp.<br>SCSIO-46591           | 2.06±0.18 <sup>a</sup>  | 1.97±0.97   | 0.71±0.21    | 2.43±0.83 | 5.12±1.79 <sup>a</sup>  |
| <i>Arthrospira platensis</i><br>SCSIO-44012     | 19.99±1.13 <sup>a</sup> | 5.94±1.06   | 12.03±1.14   | 3.45±0.30 | 21.42±2.24 <sup>a</sup> |
| <i>Uronema</i> sp.<br>SCSIO-46782               | 12.48±0.23 <sup>b</sup> | 2.17±0.08   | 2.26±0.13    | 3.71±0.54 | 8.14±0.69 <sup>a</sup>  |

Note: N.D. = not detectable; different letters indicated significant differences in DPPH radicals scavenging capacity of microalgae extracts obtained by one-step and three-step methods ( $p<0.05$ ).

**Table S16**

Table S16. FRAP activity of the ethanol/water extraction extracts and the fractionating procedure extracts from 16 microalgae strains

| Species                                         | One step                | Three steps |              |            |                          |
|-------------------------------------------------|-------------------------|-------------|--------------|------------|--------------------------|
|                                                 | ethanol/water           | hexane      | ethylacetate | water      | total                    |
| <i>Chlorella sorokiniana</i><br>SCSIO-46784     | 22.90±0.39 <sup>a</sup> | 9.98±0.67   | 9.27±0.66    | 4.54±0.12  | 23.80±0.43 <sup>a</sup>  |
| <i>Euglena gracilis</i><br>SCSIO-46781          | 56.49±1.43 <sup>a</sup> | 44.71±4.18  | 83.79±1.89   | 4.12±1.12  | 132.62±7.01 <sup>b</sup> |
| <i>Eustigmatus</i> sp.<br>SCSIO-46716           | 3.69±0.33 <sup>a</sup>  | 1.83±0.15   | 1.73±0.15    | 3.17±0.66  | 6.73±0.45 <sup>b</sup>   |
| <i>Nannochloropsis</i> sp.<br>SCSIO-45217       | 16.33±1.45 <sup>a</sup> | 5.10±0.40   | 4.40±0.17    | 5.36±0.23  | 14.86±0.60 <sup>a</sup>  |
| <i>Nannochloropsis</i> sp.<br>SCSIO-45006       | 13.20±0.57 <sup>a</sup> | 6.79±1.22   | 6.19±0.26    | 5.30±0.15  | 18.28±1.05 <sup>b</sup>  |
| <i>Nannochloropsis</i> sp.<br>SCSIO-45224       | 30.89±0.68 <sup>a</sup> | 7.70±0.42   | 16.94±0.04   | 11.37±0.40 | 36.01±0.77 <sup>b</sup>  |
| <i>Phaeodactylum tricornutum</i><br>SCSIO-45120 | 45.42±2.28 <sup>b</sup> | 4.08±0.51   | 6.05±0.20    | 9.33±0.98  | 19.46±1.37 <sup>a</sup>  |
| <i>Porphyridium cruentum</i><br>SCSIO-45949     | 10.80±0.35 <sup>a</sup> | 4.76±0.30   | 6.88±0.21    | 2.39±0.09  | 14.03±0.10 <sup>b</sup>  |
| <i>Rhodorus</i> sp.<br>SCSIO-45707              | 4.66±0.67 <sup>a</sup>  | 3.02±1.12   | 1.58±0.85    | 3.74±0.25  | 8.34±1.85 <sup>a</sup>   |
| <i>Asterarcys</i> sp.<br>SCSIO-46548            | 28.02±1.85 <sup>b</sup> | 1.10±0.08   | 0.75±0.02    | 15.21±0.77 | 17.06±0.87 <sup>a</sup>  |
| <i>Asterarcys</i> sp.<br>SCSIO-45829            | 35.42±0.54 <sup>b</sup> | 1.37±0.31   | N.D.         | 10.02±0.26 | 11.39±0.57 <sup>a</sup>  |
| <i>Scenedesmus</i> sp.<br>SCSIO-46585           | 11.43±0.26 <sup>b</sup> | 0.34±0.05   | 2.30±0.68    | 5.86±0.25  | 8.50±0.46 <sup>a</sup>   |
| <i>Scenedesmus</i> sp.<br>SCSIO-46579           | 30.45±1.40 <sup>b</sup> | 1.36±0.07   | 0.97±0.04    | 5.15±0.04  | 7.48±0.08 <sup>a</sup>   |
| <i>Scenedesmus</i> sp.<br>SCSIO-46591           | 11.49±0.60 <sup>a</sup> | 1.39±0.04   | 1.34±0.11    | 4.05±0.18  | 6.78±0.30 <sup>a</sup>   |
| <i>Arthrospira platensis</i><br>SCSIO-44012     | 17.50±0.94 <sup>a</sup> | 7.48±0.52   | 22.96±1.98   | 20.66±0.67 | 51.10±2.59 <sup>b</sup>  |
| <i>Uronema</i> sp.<br>SCSIO-46782               | 19.47±1.03 <sup>a</sup> | 5.06±0.74   | 4.12±0.63    | 9.06±1.52  | 18.24±1.09 <sup>a</sup>  |

Note: N.D. = not detectable; different letters indicated significant differences in FRAP activity of microalgae extracts obtained by one-step and three-step methods ( $p<0.05$ ).
